# Supplementary material for: Assessment of the Potential Impacts of Wheat Plant Traits across Environments by Combining Crop Modeling and Global Sensitivity Analysis
Source: PubMed Central journal article supplement (PMC4723307; doi:10.1371/journal.pone.0146385), 2016-01-22

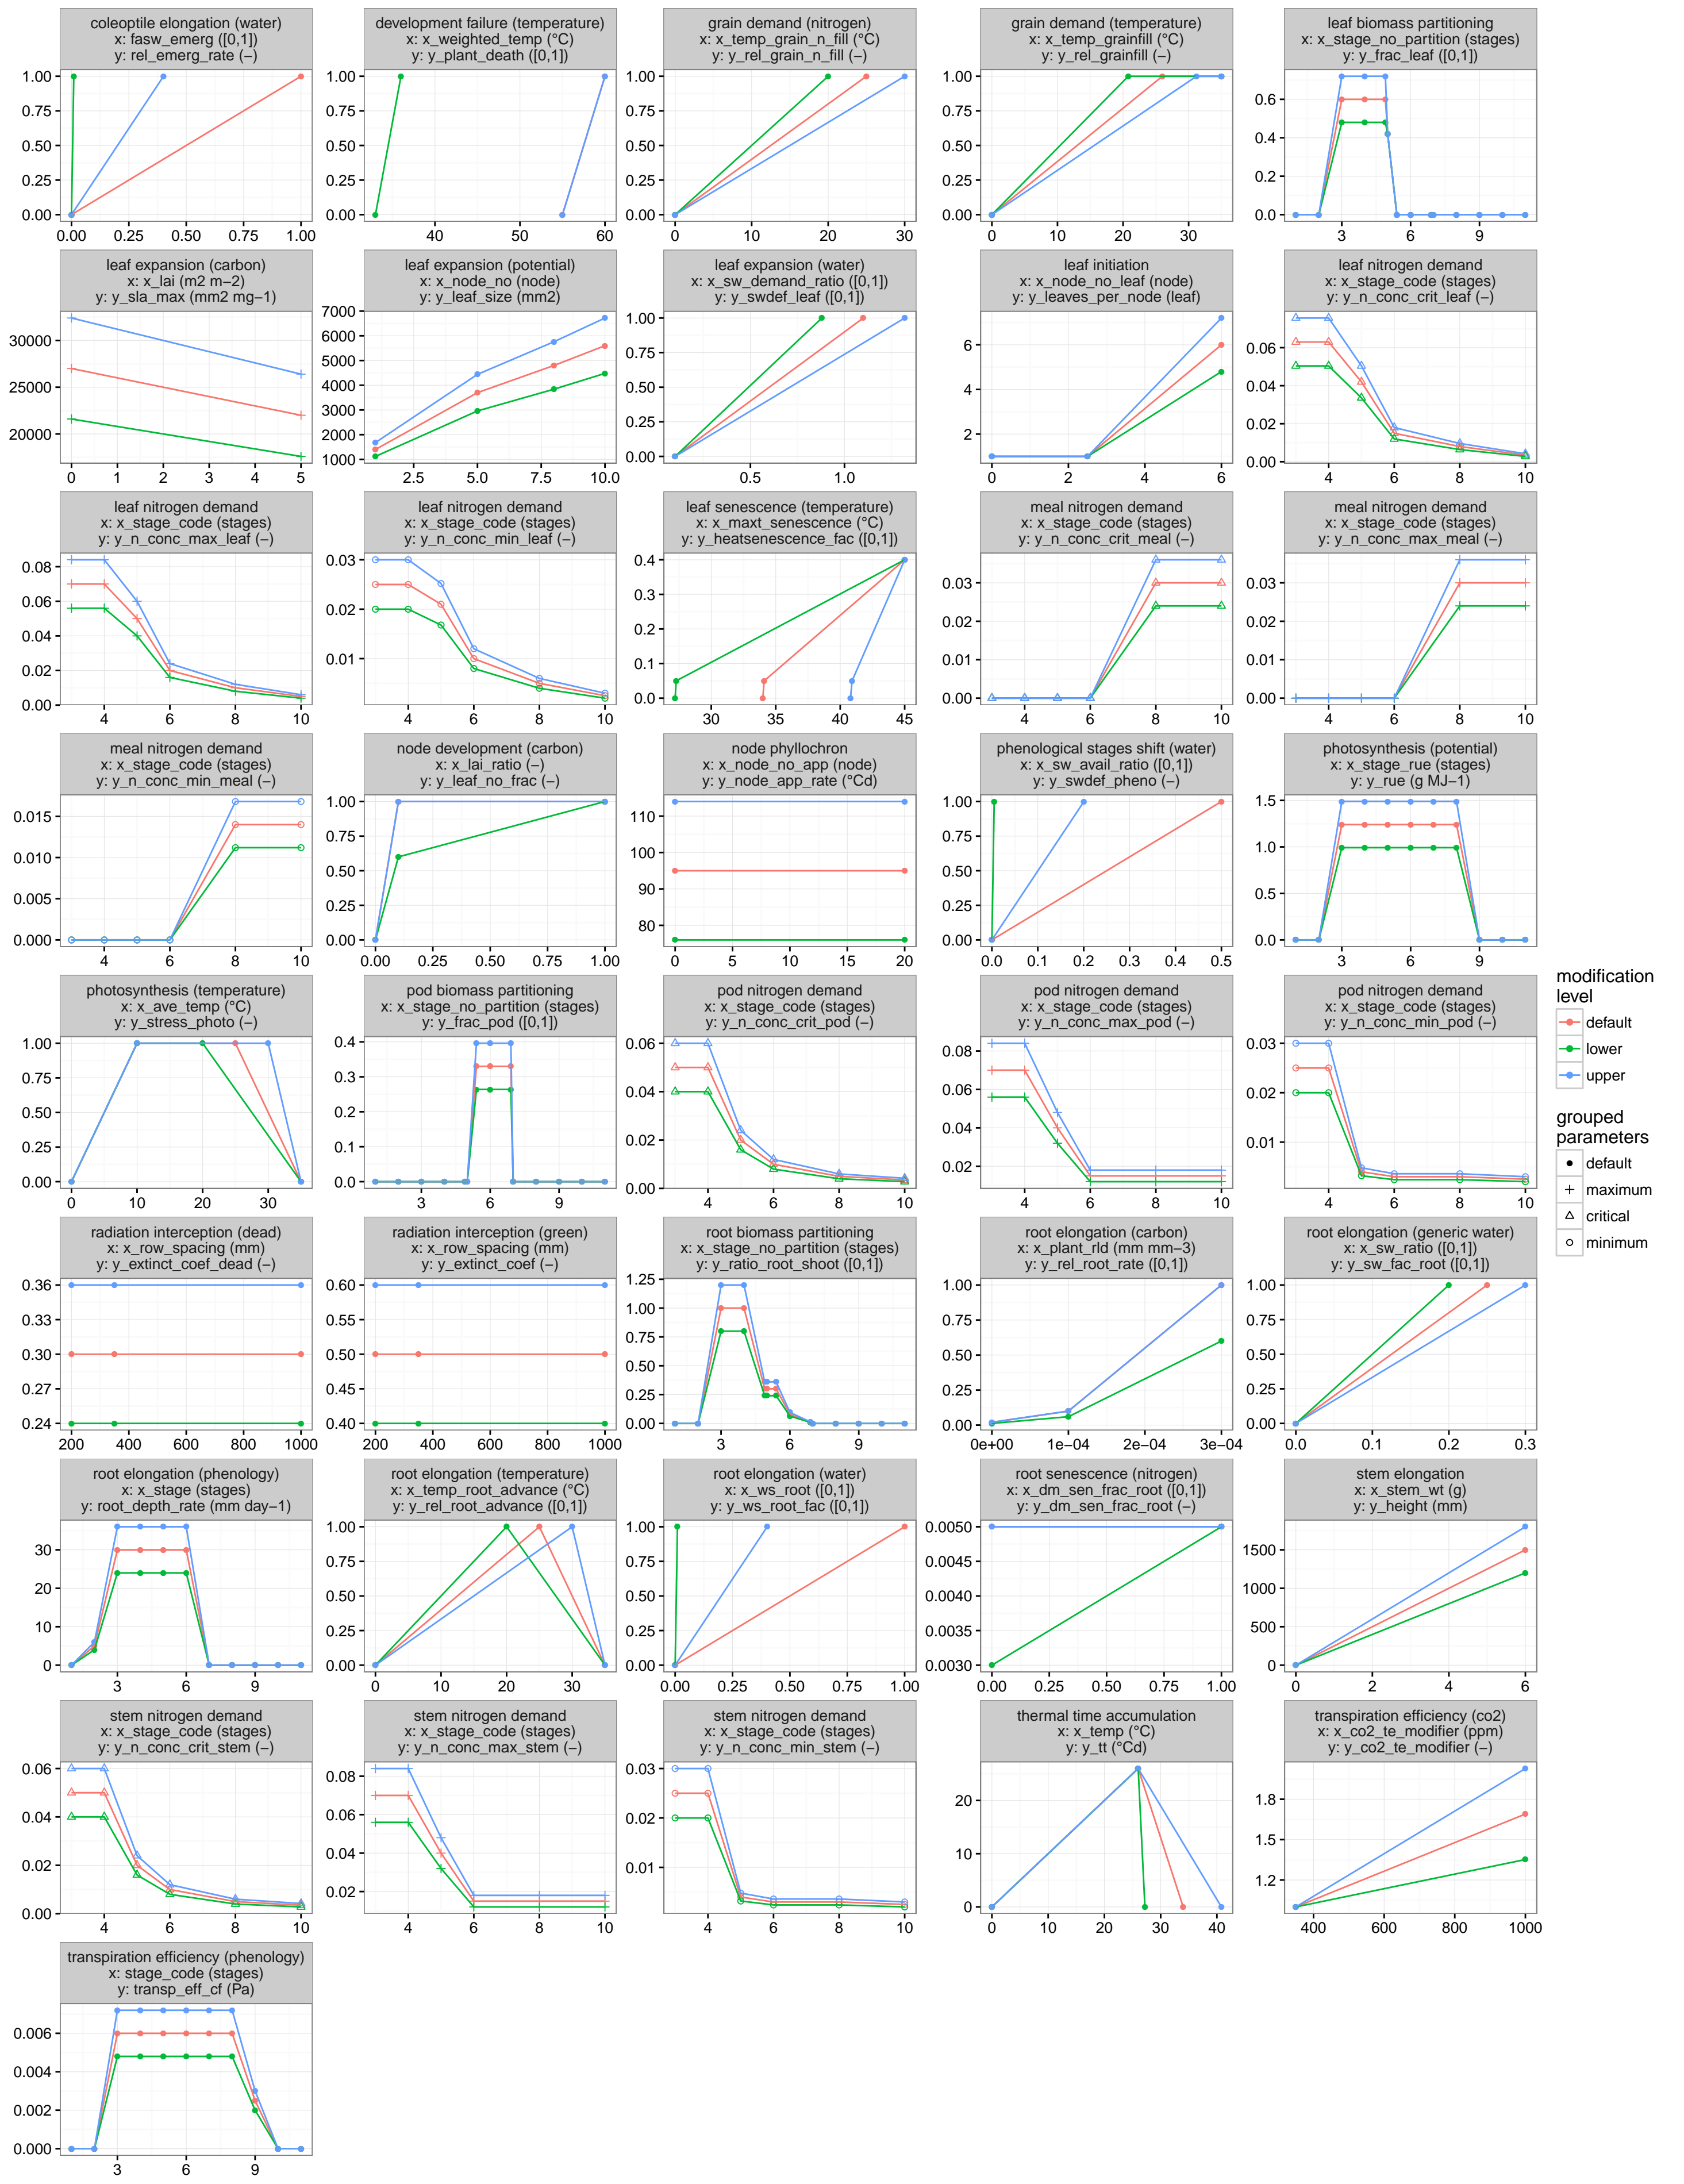

Supplement: pone.0146385.s001.pdf [file pone.0146385.s001.pdf]
