# Supplementary material for: Assessment of the Potential Impacts of Wheat Plant Traits across Environments by Combining Crop Modeling and Global Sensitivity Analysis
Source: PubMed Central journal article supplement (PMC4723307; doi:10.1371/journal.pone.0146385), 2016-01-22
Supplement: pone.0146385.s002.pdf [file pone.0146385.s002.pdf]

| Module    | Process                                              | Factor                       | Description                                                                                                                                              | Default Value                           | Unit        |
|-----------|------------------------------------------------------|------------------------------|----------------------------------------------------------------------------------------------------------------------------------------------------------|-----------------------------------------|-------------|
| phenology | thermal time accumulation                            | x_temp                       | Cardinal temperatures affecting the effective thermal time (y_tt = 0 26 0 oCd)                                                                           | 0 26 34                                 | °C          |
| phenology | germination failure (time)                           | days_germ_limit              | Maximum days allowed after sowing for germination to take place                                                                                          | 40                                      | days        |
| phenology | coleoptile elongation (water)                        | fasw_emerg                   | Fraction of available soil water affecting the stress factor [0-1] for thermal time calculation between germination and emergence (rel_emerg_rate = 1 1) | 0 1                                     | [0,1]       |
| phenology | <b>emergence (temperature)</b>                       | shoot_lag                    | Time lag before linear coleoptile growth starts                                                                                                          | 40                                      | °Cd         |
| phenology | <b>coleoptile elongation (temperature)</b>           | shoot_rate                   | Degree days required to increase coleoptile by 1 mm                                                                                                      | 1.5                                     | °Cd mm-1    |
| phenology | emergence failure (temperature)                      | tt_emerg_limit               | Maximum degree days allowed for emergence to take place                                                                                                  | 300                                     | °Cd         |
| phenology | <b>node phyllochron</b>                              | y_node_app_rate              | Thermal time between the appearance of successive nodes as a function of the node number of the main stem (x_node_no_app = 0 20)                         | 95 95                                   | °Cd         |
| phenology | leaf initiation                                      | y_leaves_per_node            | Leaf per node defined as a function of x_node_no_leaf=0 2.5 6                                                                                            | 1 1 6                                   | leaf node-1 |
| phenology | node development (carbon)                            | y_leaf_no_frac               | Leaf appearance depending on LAI (x_lai_ratio = 0 0.1 0.8 1)                                                                                             | 0 1 1                                   | [0-1]       |
| phenology | phenology failure                                    | swdf_pheno_limit             | Critical cumulative phenology water stress, above which the crop fails                                                                                   | 25                                      | -           |
| phenology | development failure (temperature)                    | x_weighted_temp              | Temperature affecting plant death (y_plant_death = 0 1)                                                                                                  | 55 60                                   | °C          |
| cultivar  | <b>phenological stages shift (photoperiod)</b>       | photop_sens                  | Sensitivity to photoperiod                                                                                                                               | 3                                       | -           |
| cultivar  | <b>phenological stages shift (vernalisation)</b>     | vern_sens                    | Sensitivity to vernalisation                                                                                                                             | 1.5                                     | -           |
| cultivar  | <b>thermal time accumulation (juvenile)</b>          | tt_end_of_juvenile           | Thermal time between plant emergence and end of juvenile stage                                                                                           | 400                                     | °Cd         |
| cultivar  | <b>thermal time accumulation (floral initiation)</b> | tt_floral_initiation         | Thermal time between end of juvenile and floral initiation                                                                                               | 555                                     | °Cd         |
| cultivar  | <b>thermal time accumulation (flowering)</b>         | tt_flowering                 | Thermal time between floral initiation and flowering                                                                                                     | 120                                     | °Cd         |
| cultivar  | <b>thermal time accumulation (grain filling)</b>     | tt_start_grain_fill          | Thermal time between flowering and start of grain filling                                                                                                | 545                                     | °Cd         |
| cultivar  | stem elongation                                      | y_height                     | plant canopy height for stem weight per plant (x_stem_wt = 0 6 g plant-1)                                                                                | 0 1500                                  | mm          |
| cultivar  | <b>grain development</b>                             | grains_per_gram_stem         | Number of grains that are set depending on the stem dry weight                                                                                           | 25                                      | grain g-1   |
| cultivar  | <b>grain demand (flowering)</b>                      | potential_grain_growth_rate  | Potential rate of grain growth from flowering to grain fill                                                                                              | 0.001                                   | g d-1       |
| cultivar  | <b>grain demand (maturity)</b>                       | potential_grain_filling_rate | Potential rate of grain growth during grain filling                                                                                                      | 0.002                                   | g d-1       |
| cultivar  | <b>grain demand (maximum)</b>                        | max_grain_size               | Potential grain size                                                                                                                                     | 0.041                                   | g           |
| biomass   | initial leaf biomass                                 | leaf_dm_init                 | Initial leaf dry matter                                                                                                                                  | 0.003                                   | g           |
| biomass   | initial root biomass                                 | root_dm_init                 | Initial root dry matter                                                                                                                                  | 0.01                                    | g           |
| biomass   | initial stem biomass                                 | stem_dm_init                 | Initial stem dry matter                                                                                                                                  | 0.0016                                  | g           |
| biomass   | photosynthesis (co2)                                 | co2_rue_modifier             | Factor affecting the CO2 compensation point                                                                                                              | 163                                     | -           |
| biomass   | biomass growth (generic temperature)                 | tfac_slope                   | Temperature stress factor slope                                                                                                                          | 0.0125                                  | -           |
| biomass   | biomass growth (generic temperature, min)            | temp_fac_min                 | Temperature stress factor minimum                                                                                                                        | 0.69                                    | -           |
| biomass   | biomass growth (generic water)                       | sfac_slope                   | Soil water stress factor slope                                                                                                                           | -0.125                                  | -           |
| biomass   | biomass growth (generic water, max)                  | sw_fac_max                   | Soil water stress factor maximum                                                                                                                         | 1.125                                   | -           |
| biomass   | biomass growth (temperature)                         | x_ave_temp                   | Daily mean temperatures affecting the RUE multiplier [0-1] (y_stress_photo = 0 1 1 0)                                                                    | 0 10 25 35                              | °C          |
| biomass   | <b>radiation interception (green)</b>                | y_extinct_coef               | Extinction coefficient of green leaves as a response to row spacing (x_row_spacing = 200 350 1000 mm)                                                    | 0.5 0.5 0.5                             | -           |
| biomass   | radiation interception (dead)                        | y_extinct_coef_dead          | Extinction coefficient for dead leaves as a response to row width (x_row_spacing = 200 350 1000 mm)                                                      | 0.3 0.3 0.3                             | -           |
| biomass   | <b>grain demand (temperature)</b>                    | x_temp_grainfill             | Temperatures affecting stress index [0-1] for the potential grain filling rate (y_rel_grainfill = 0 1 1)                                                 | 0 26 35                                 | °C          |
| biomass   | <b>grain demand (nitrogen)</b>                       | x_temp_grain_n_fill          | Temperatures affecting stress index [0-1] for potential N filling rate (y_rel_grain_n_fill = 0 1 1)                                                      | 0 25                                    | °C          |
| biomass   | <b>photosynthesis (potential)</b>                    | y_rue                        | Radiation Use Efficiency depending on stages                                                                                                             | 0 0 1.24 1.24 1.24 1.24 1.24 1.24 0 0 0 | g MJ-1      |
| biomass   | <b>root biomass partitioning</b>                     | y_ratio_root_shoot           | Root/shoot ratio as a function of specific stages (x_stage_no_partition = 1 2 3 4 4.9 5 5.4 6 6.9 7 8 9 10 11)                                           | 0 0 1 1 0.3 0.3 0.3 0.08 0.01 0 0 0 0 0 | [0,1]       |
| biomass   | <b>leaf biomass partitioning</b>                     | y_frac_leaf                  | Fraction of remaining dry matter allocated to leaves for specific stages (specific stages (x_stage_no_partition = 1 2 3 4 4.9 5 5.4 6 6.9 7 8 9 10 11)   | 0 0 0.6 0.6 0.6 0.42 0 0 0 0 0 0 0      | [0,1]       |
| biomass   | <b>pod biomass partitioning</b>                      | y_frac_pod                   | Fraction of dry matter allocated to rachis for specific stages (x_stage_no_partition = 1 2 3 4 4.9 5 5.4 6 6.9 7 8 9 10 11)                              | 0 0 0 0 0 0.33 0.33 0.33 0 0 0 0 0      | [0,1]       |
| biomass   | grain water content                                  | grn_water_cont               | Water content of grain                                                                                                                                   | 0.125                                   | g g-1       |

| Module   | Process                                      | Factor                 | Description                                                                                                                                             | Default Value                        | Unit                               |
|----------|----------------------------------------------|------------------------|---------------------------------------------------------------------------------------------------------------------------------------------------------|--------------------------------------|------------------------------------|
| leaf     | <b>leaf expansion (init)</b>                 | initial_tpla           | Initial total plant leaf area                                                                                                                           | 200                                  | mm <sup>2</sup>                    |
| leaf     | <b>leaf expansion (carbon)</b>               | y_sla                  | Parameter added to change minimum and maximum values all at once                                                                                        | 1                                    | -                                  |
| leaf     | leaf expansion                               | node_no_correction     | Number of growing leaves in the sheath                                                                                                                  | 2                                    | leaf                               |
| leaf     | leaf expansion (carbon)*                     | sla_min                | Minimum specific leaf area                                                                                                                              | 18000                                | mm <sup>2</sup> mg <sup>-1</sup>   |
| leaf     | leaf expansion (carbon)*                     | y_sla_max              | Maximum specific leaf area as a function of daily change in LAI (x_lai = _sla_max)                                                                      | 27000 22000                          | mm <sup>2</sup> g <sup>-1</sup>    |
| leaf     | leaf expansion (failure)                     | leaf_no_crit           | Critical number of leaves, below which portion of the crop may die due to water stress                                                                  | 10                                   | leaf                               |
| leaf     | leaf expansion (potential)                   | y_leaf_size            | Leaf potential size depending on the number of nodes appeared (x_node_no = 1 5 8 10) and the growing leaf number in the sheath (node_no_correction = 2) | 1400 3700 4800 5600                  | mm <sup>2</sup>                    |
| root     | <b>root absorption (capacity)</b>            | ll_modifier            | Parameter added to change crop lower limit values for all depths at once                                                                                | 1                                    | -                                  |
| root     | <b>root absorption (potential)</b>           | kl_modifier            | Parameter added to change crop kl values for all depths at once                                                                                         | 1                                    | -                                  |
| root     | <b>root elongation (phenology)</b>           | root_depth_rate        | Potential rate of root front increase for the different stages                                                                                          | 0 5 30 30 30 30 0 0 0 0              | mm day <sup>-1</sup>               |
| root     | <b>root elongation (soil structure)</b>      | xf_modifier            | Parameter added to change crop xf values for all depths at once                                                                                         | 1                                    | -                                  |
| root     | <b>root elongation (temperature)</b>         | x_temp_root_advance    | Temperatures affecting root front by the [0-1] stress index: y_rel_root_advance = 0 1 0                                                                 | 0 25 35                              | °C                                 |
| root     | root elongation (carbon)                     | specific_root_length   | Specific root length                                                                                                                                    | 105000                               | mm g <sup>-1</sup>                 |
| root     | root elongation (carbon)                     | y_rel_root_rate        | Factor affecting root length density in a layer, which depends on root branching (x_plant_rld = 0 0.0001 0.0003 mm/mm <sup>3</sup> /plant)              | 0.02 0.1 1                           | [0,1]                              |
| root     | root elongation (generic water)              | x_sw_ratio             | Water availability affecting the stress factor for root depth growth (y_sw_fac_root = 0 1)                                                              | 0 0.25                               | [0,1]                              |
| root     | root elongation (init)                       | initial_root_depth     | Initial depth of roots                                                                                                                                  | 100                                  | mm                                 |
| root     | root elongation (water)                      | x_ws_root              | Water supply demand ratio affecting the increase in root depth (y_ws_root_fac = 1 1)                                                                    | 0 1                                  | [0,1]                              |
| water    | phenological stages shift (water)            | x_sw_avail_ratio       | Water availability that affects stress indices for phenology: y_swdef_pheno = 1.0 1.0                                                                   | 0 0.5                                | [0,1]                              |
| water    | leaf expansion (water)                       | x_sw_demand_ratio      | Water availability that affects stress indices for leaf expansion: y_swdef_leaf = 0 1                                                                   | 0.1 1.1                              | [0,1]                              |
| water    | photosynthesis failure (water)               | swdf_photo_limit       | Critical cumulative photosynthesis water stress, above which the crop partly fails                                                                      | 99                                   | -                                  |
| water    | <b>transpiration efficiency (phenology)</b>  | transp_eff_cf          | Transpiration efficiency coefficient for aboveground biomass for the different stage codes                                                              | 0 0 0.006 0.006 0.006 0.006 0.006    | g m <sup>-2</sup> mm <sup>-1</sup> |
| water    | <b>water demand (VPD)</b>                    | eo_crop_factor_default | Default crop factor for limiting soil                                                                                                                   | 1.5                                  | kPa                                |
| water    | <b>transpiration efficiency (co2)</b>        | y_co2_te_modifier      | CO <sub>2</sub> factor for transpiration efficiency in response to x_co2_te_modifier = 350 700 1000 ppm (small hypothesis)                              | 1 1.69                               | -                                  |
| nitrogen | initial leaf nitrogen                        | leaf_n_init_conc       | Leaf initial N concentration                                                                                                                            | 0.063                                | g g <sup>-1</sup>                  |
| nitrogen | initial root nitrogen                        | root_n_init_conc       | Root initial N concentration                                                                                                                            | 0.02                                 | g g <sup>-1</sup>                  |
| nitrogen | initial stem nitrogen                        | stem_n_init_conc       | Stem initial N concentration                                                                                                                            | 0.05                                 | g g <sup>-1</sup>                  |
| nitrogen | initial pod nitrogen                         | pod_n_init_conc        | Rachis initial N concentration                                                                                                                          | 0.063                                | g g <sup>-1</sup>                  |
| nitrogen | <b>nitrogen supply</b>                       | kno3                   | Constant for extractable soil nitrogen                                                                                                                  | 0.02                                 | -                                  |
| nitrogen | nitrogen supply (potential)                  | total_n_uptake_max     | Maximum total nitrogen uptake in a soil layer                                                                                                           | 0.6                                  | g m <sup>-2</sup>                  |
| nitrogen | phenological stages shift (nitrogen)         | N_fact_pheno           | Multiplier for N deficit effect on phenology                                                                                                            | 100                                  | -                                  |
| nitrogen | <b>leaf expansion (nitrogen)</b>             | N_fact_expansion       | Multiplier for N deficit effect on leaf expansion                                                                                                       | 1                                    | -                                  |
| nitrogen | <b>photosynthesis (nitrogen)</b>             | N_fact_photo           | Multiplier for nitrogen deficit effect on photosynthesis                                                                                                | 1.5                                  | -                                  |
| nitrogen | <b>leaf nitrogen remobilisation</b>          | leaf_n_sen_conc        | N concentration that remains in senesced leaves (i.e. that is not retranslocated)                                                                       | 0.005                                | g g <sup>-1</sup>                  |
| nitrogen | <b>grain filling (nitrogen)</b>              | N_fact_grain           | Multiplier for N deficit effect on grain filling                                                                                                        | 1.5                                  | -                                  |
| nitrogen | <b>leaf nitrogen demand (min, crit, max)</b> | n_conc_leaf            | Parameter added to change minimum, critical and maximum values of n_conc_leaf all at once                                                               | 1                                    | -                                  |
| nitrogen | leaf nitrogen demand*                        | y_n_conc_crit_leaf     | Critical leaf N concentration at the different stages                                                                                                   | 0.063 0.063 0.042 0.015 0.008 0.0035 | g g <sup>-1</sup>                  |
| nitrogen | leaf nitrogen demand*                        | y_n_conc_max_leaf      | Maximum leaf N concentration at the different stages                                                                                                    | 0.07 0.07 0.05 0.02 0.01 0.005       | g g <sup>-1</sup>                  |
| nitrogen | leaf nitrogen demand*                        | y_n_conc_min_leaf      | Minimum leaf N concentration at the different stages                                                                                                    | 0.025 0.025 0.021 0.01 0.005 0.0025  | g g <sup>-1</sup>                  |
| nitrogen | <b>root nitrogen demand (min, crit, max)</b> | n_conc_root            | Parameter added to change minimum, critical and maximum values of n_conc_root all at once                                                               | 1                                    | -                                  |
| nitrogen | root nitrogen demand*                        | n_conc_crit_root       | Critical root N concentration at the different stages                                                                                                   | 0.02                                 | g g <sup>-1</sup>                  |
| nitrogen | root nitrogen demand*                        | n_conc_max_root        | Maximum root N concentration at the different stages                                                                                                    | 0.02                                 | g g <sup>-1</sup>                  |
| nitrogen | root nitrogen demand*                        | n_conc_min_root        | Minimum root N concentration at the different stages                                                                                                    | 0.01                                 | g g <sup>-1</sup>                  |
| nitrogen | root nitrogen remobilisation                 | root_n_sen_conc        | N concentration that remains in the senesced roots (i.e. that is not retranslocated)                                                                    | 0.005                                | g g <sup>-1</sup>                  |
| nitrogen | <b>stem nitrogen demand (min, crit, max)</b> | n_conc_stem            | Parameter added to change minimum, critical and maximum values of n_conc_stem all at once                                                               | 1                                    | -                                  |
| nitrogen | stem nitrogen demand*                        | y_n_conc_crit_stem     | Critical stem N concentration at the different stages                                                                                                   | 0.05 0.05 0.02 0.01 0.005 0.0035     | g g <sup>-1</sup>                  |
| nitrogen | stem nitrogen demand*                        | y_n_conc_max_stem      | Maximum stem N concentration at the different stages                                                                                                    | 0.07 0.07 0.04 0.015 0.015 0.015     | g g <sup>-1</sup>                  |
| nitrogen | stem nitrogen demand*                        | y_n_conc_min_stem      | Minimum stem N concentration at the different stages                                                                                                    | 0.025 0.025 0.004 0.003 0.003 0.0025 | g g <sup>-1</sup>                  |
| nitrogen | stem nitrogen remobilisation                 | stem_n_sen_conc        | N concentration that remains in the senesced stems (i.e. that is not retranslocated)                                                                    | 0.0025                               | g g <sup>-1</sup>                  |

| Module     | Process                               | Factor             | Description                                                                                                              | Default Value                        | Unit        |
|------------|---------------------------------------|--------------------|--------------------------------------------------------------------------------------------------------------------------|--------------------------------------|-------------|
| nitrogen   | pod nitrogen demand (min, crit, max)  | n_conc_pod         | Parameter added to change minimum, critical and maximum values of n_conc_pod all at once                                 | 1                                    | -           |
| nitrogen   | pod nitrogen demand*                  | y_n_conc_crit_pod  | Critical rachis N concentration at the different stages                                                                  | 0.05 0.05 0.02 0.01 0.005 0.0035     | g g-1       |
| nitrogen   | pod nitrogen demand*                  | y_n_conc_max_pod   | Maximum rachis N concentration at the different stages                                                                   | 0.07 0.07 0.04 0.015 0.015 0.015     | g g-1       |
| nitrogen   | pod nitrogen demand*                  | y_n_conc_min_pod   | Minimum rachis N concentration at the different stages                                                                   | 0.025 0.025 0.004 0.003 0.003 0.0025 | g g-1       |
| nitrogen   | pod nitrogen remobilisation           | pod_n_sen_conc     | N concentration that remains in the senesced rachis (spike without grains)                                               | 0.007                                | g g-1       |
| nitrogen   | meal nitrogen demand (min, crit, max) | n_conc_meal        | Parameter added to change minimum, critical and maximum values of n_conc_meal all at once                                | 1                                    | -           |
| nitrogen   | meal nitrogen demand*                 | y_n_conc_crit_meal | Critical meal N concentration at the different stages                                                                    | 0 0 0 0.03 0.03                      | g g-1       |
| nitrogen   | meal nitrogen demand*                 | y_n_conc_max_meal  | Maximum meal N concentration at the different stages                                                                     | 0 0 0 0.03 0.03                      | g g-1       |
| nitrogen   | meal nitrogen demand*                 | y_n_conc_min_meal  | Minimum meal N concentration at the different stages                                                                     | 0 0 0 0.014 0.014                    | g g-1       |
| nitrogen   | meal nitrogen remobilisation          | meal_n_sen_conc    | N concentration that remains in senesced grains (i.e. that is not retranslocated)                                        | 0.014                                | g g-1       |
| nitrogen   | gain nitrogen demand (min, crit, max) | n_conc_grain       | Parameter added to change minimum, critical and maximum values of n_conc_grain all at once                               | 1                                    | -           |
| nitrogen   | grain nitrogen demand*                | n_conc_crit_grain  | Critical grain N concentration at the different stages                                                                   | 0.03                                 | g g-1       |
| nitrogen   | grain nitrogen demand*                | n_conc_max_grain   | Maximum grain N concentration at the different stages                                                                    | 0.03                                 | g g-1       |
| nitrogen   | grain nitrogen demand*                | n_conc_min_grain   | Minimum grain N concentration at the different stages                                                                    | 0.014                                | g g-1       |
| senescence | <b>leaf senescence (age)</b>          | fr_lf_sen_rate     | Fraction of total leaf number senescing per main stem node                                                               | 0.035                                | [0-1]       |
| senescence | <b>leaf senescence (age)</b>          | node_sen_rate      | Rate of node senescence on main stem                                                                                     | 60                                   | °Cd node-1  |
| senescence | <b>leaf senescence (temperature)</b>  | x_maxt_senescence  | Minimum temperature affecting the daily fraction of leaf area senescing due to heat (y_heatsenescence_fac = 0 0.05 0.40) | 34 34.1 45                           | °C          |
| senescence | <b>leaf senescence (water)</b>        | sen_rate_water     | Slope in linear equation relating soil water stress during photosynthesis to leaf senescence rate                        | 0.1                                  | -           |
| senescence | leaf senescence (carbon)              | min_tpla           | Lower limit of total leaf area per plant                                                                                 | 5                                    | mm2 plant-1 |
| senescence | leaf senescence (shading)             | lai_sen_light      | Critical LAI when shading is starting to cause leaf area senescence                                                      | 7                                    | m2 m-2      |
| senescence | leaf senescence (shading)             | sen_light_slope    | Sensitivity of leaf area senescence to shading                                                                           | 0.002                                | -           |
| senescence | root senescence (nitrogen)            | y_dm_sen_frac_root | Rate of root biomass senescing each day as a function of x_dm_sen_frac_root = 0 1                                        | 0.005 0.005                          | [0-1]       |

**Table S1. Description of the APSIM-Wheat parameters included in the sensitivity analysis.** *Module* refers to the sub-model where the parameter is used in APSIM-Wheat, *Process* refers to the physiological process targeted by the considered parameter and *Factor* is the parameter name used in the present study and in the APSIM-Wheat documentation (Zheng et al., 2014), where a complete description of the parameters is given. The *Default Value* field lists the nominal value of the parameter for cultivar *Hartog* in APSIM-Wheat 7.5 (only first three values were presented when the parameter is defined as a vector). In the *Process* field, influential parameters in indicated in bold and parameters that were grouped together for physiologic reasons are identified by (\*).
